# Supplementary material for: Short-Term Effect of Moderate Level Air Pollution on Outpatient Visits for Multiple Clinic Departments: A Time-Series Analysis in Xi’an China
Source: MDPI journal article supplement (doi:10.3390/toxics11020166), 2023-02-09
Supplement: s1 [file s1]

## **Supplementary Material**

### **Short-Term Effect of Moderate Level Air Pollution on Outpatient Visits for Multiple Clinic Departments: A Time-Series Analysis in Xi'an China**

Qingnan Wang <sup>1</sup>, Zhuo Chen <sup>2,3</sup>, Wei Huang <sup>1,4</sup>, Bo Kou <sup>5,\*</sup> and Jingwei Li <sup>1</sup>

1 Department of Information Management, School of Management, Xi'an Jiaotong University, Xi'an 710049, China

2 College of Public Health, University of Georgia, Athens, GA 30602, USA

3 School of Economics, University of Nottingham Ningbo China, Ningbo 315000, China

4 College of Business, Southern University of Science and Technology, Shenzhen 518055, China

5 Department of Otolaryngology, the First Affiliated Hospital of Xi'an Jiaotong University, Xi'an 710016, China

\* Correspondence: bobiekou84@gmail.com

## **Caption list**

**Figure S1. Associations of air pollutants with department visits using different lags of temperature.**

**Figure S2. Associations of air pollutants with department visits using different degrees of freedom for time trends.**

**Figure S3. Concentration-response relationship curves for the associations between short-term exposure to air pollutants (cumulative lags from 0 to 3 days) and outpatient visits of different departments.**

**Table S1. Spearman's correlation coefficients between daily air pollutant concentrations and meteorological conditions in Xi'an, 2016-2018.**

**Table S2. Correlation coefficients between daily air pollutant concentrations in Xi'an, 2016-2018.**

## Figures

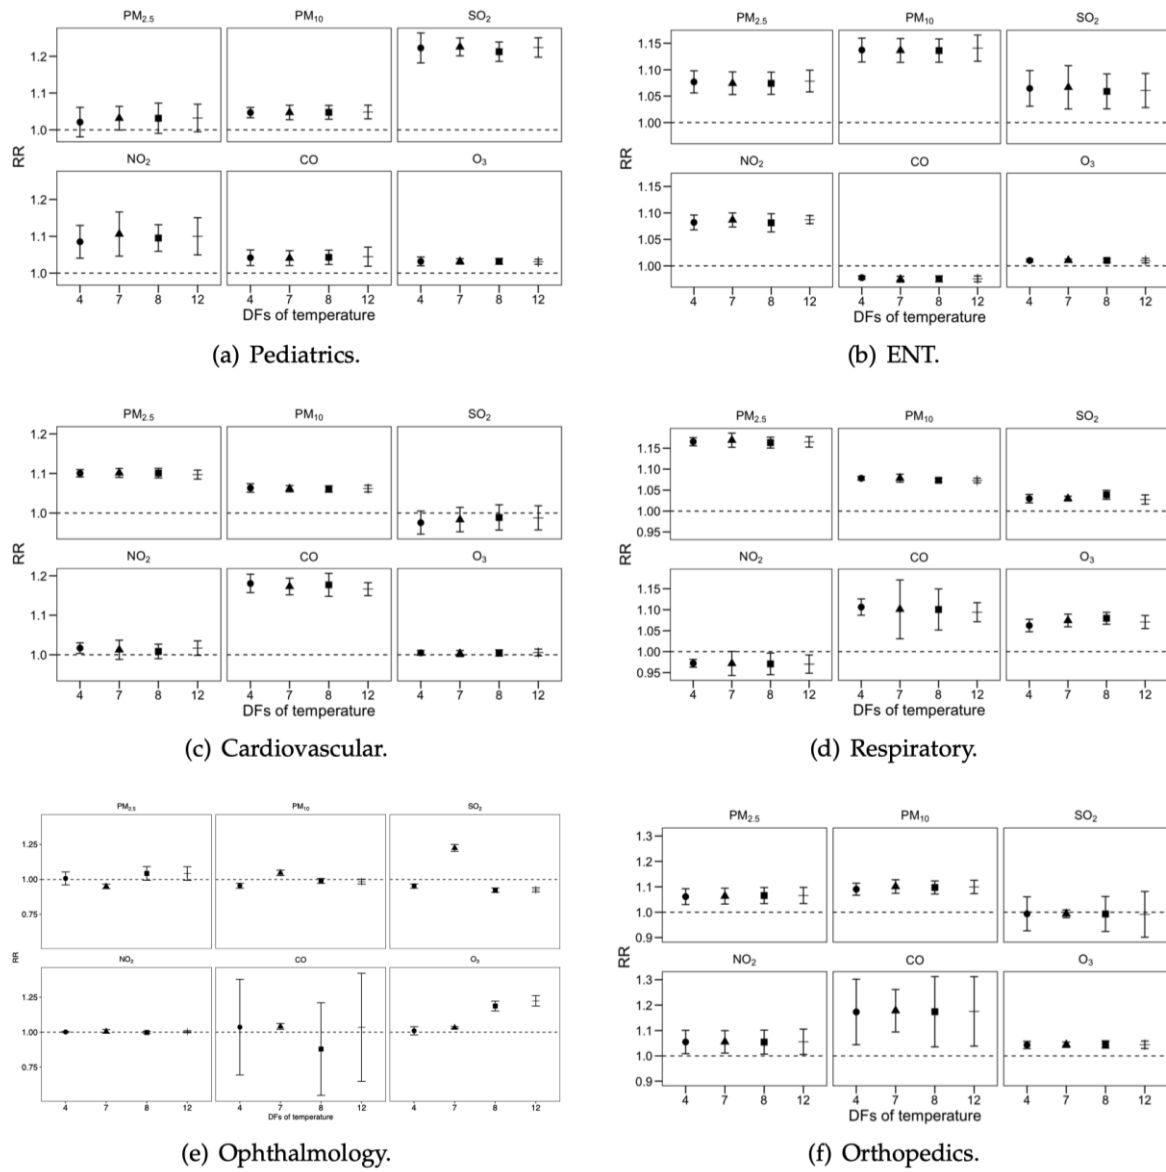

**Figure S1.** Associations of air pollutants with department visits using different lags of temperature.

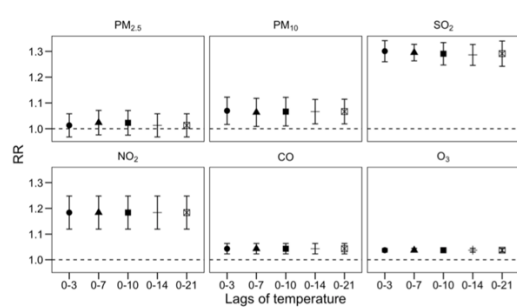

(a) Pediatrics.

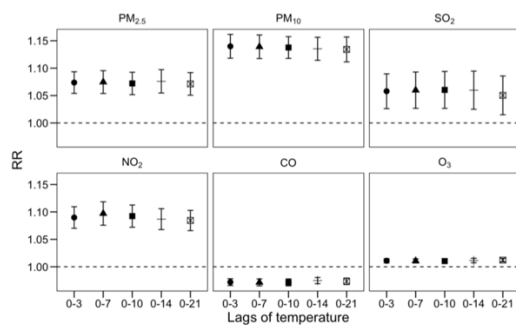

(b) ENT.

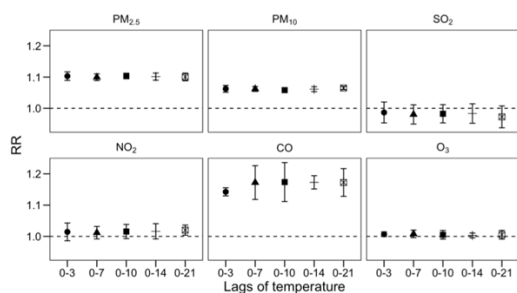

(c) Cardiovascular.

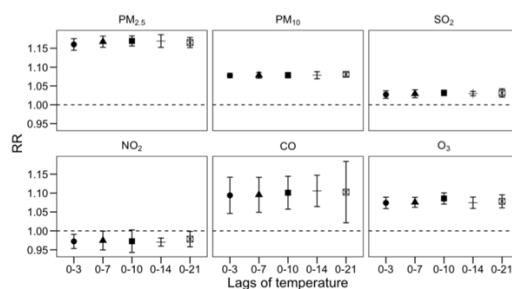

(d) Respiratory.

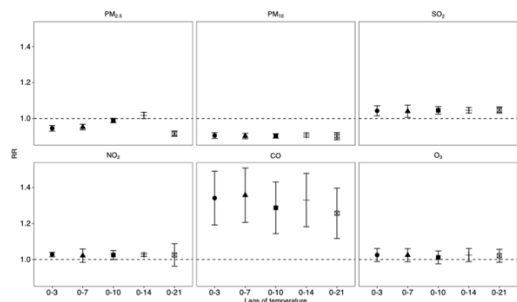

(e) Ophthalmology.

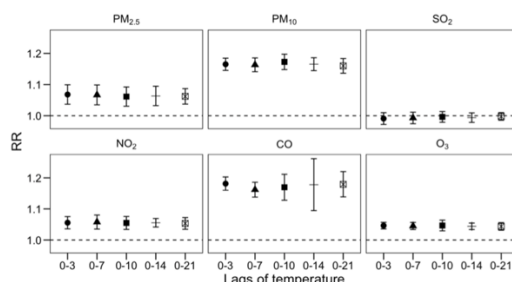

(f) Orthopedics.

**Figure S2.** Associations of air pollutants with department visits using different degrees of freedom for time trends.

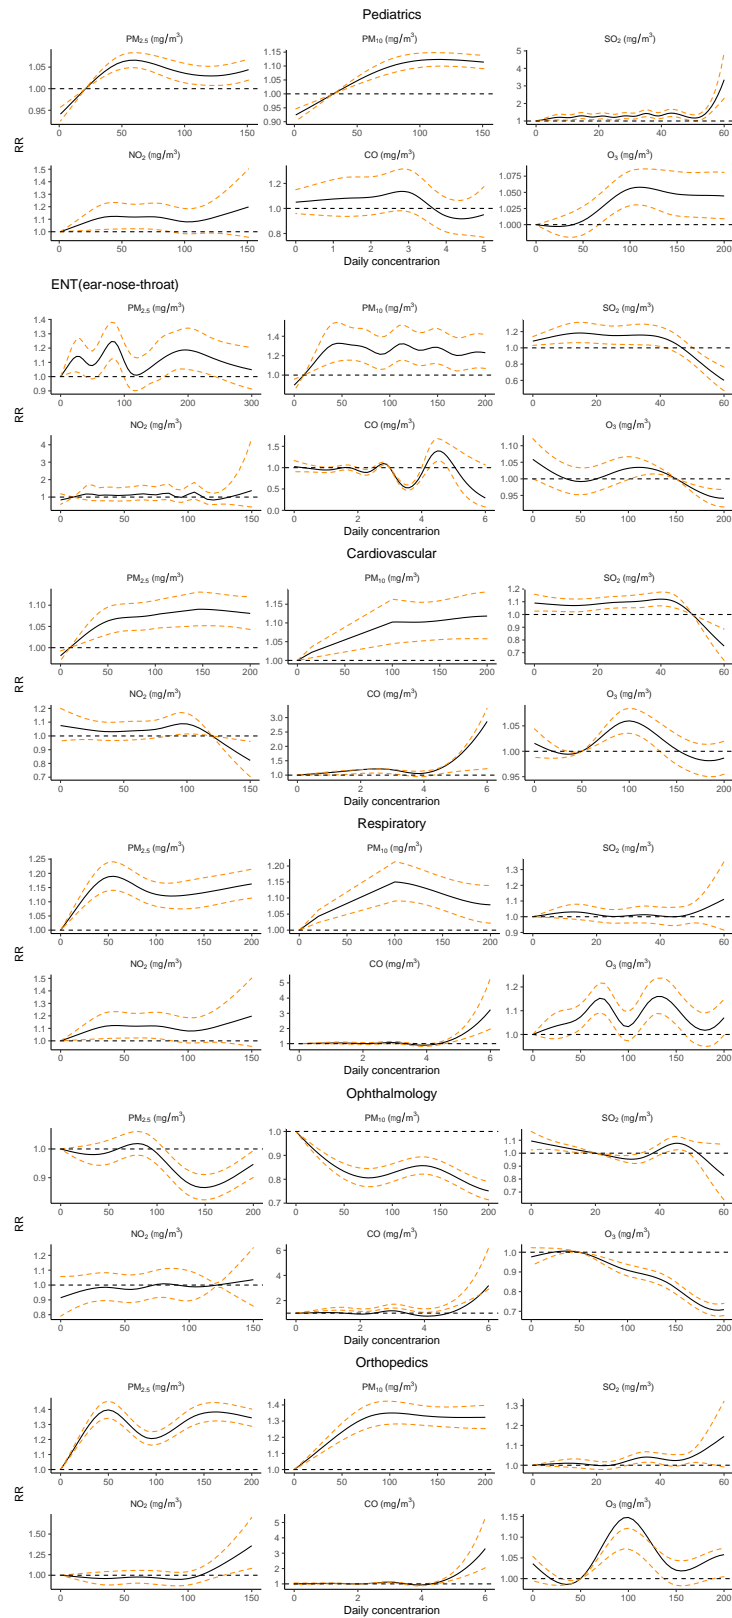

**Figure S3.** Concentration-response relationship curves for the associations between short-term exposure to air pollutants (cumulative lags from 0 to 3 days) and outpatient visits of different departments.

## Tables

**Table S1.** Spearman's correlation coefficients between daily air pollutant concentrations and meteorological conditions in Xi'an, Jan.2016-Dec.2018.

|             | $PM_{10}$ | $SO_2$ | $NO_2$ | $CO$   | $O_3$   | Temperature | RH      |
|-------------|-----------|--------|--------|--------|---------|-------------|---------|
| $PM_{2.5}$  | 0.93**    | 0.78** | 0.86** | 0.74** | -0.50** | -0.59**     | 0.01    |
| $PM_{10}$   |           | 0.80** | 0.77** | 0.76** | -0.41** | 0.52**      | -0.16** |
| $SO_2$      |           |        | 0.77** | 0.82** | -0.49** | -0.70**     | -0.28** |
| $NO_2$      |           |        |        | 0.71** | -0.39** | -0.51**     | -0.18** |
| $CO$        |           |        |        |        | -0.58** | -0.64**     | 0.08**  |
| $O_3$       |           |        |        |        |         | 0.81**      | -0.36** |
| Temperature |           |        |        |        |         |             | -0.02   |

RH: relative humidity.

\*\* : p value<0.01.

**Table S2.** Correlation coefficients between daily air pollutant concentrations in Xi'an, Jan.2016-Dec.2018.

| $R^2$      | $PM_{10}$ | $SO_2$ | $NO_2$ | $CO$ | $O_3$ |
|------------|-----------|--------|--------|------|-------|
| $PM_{2.5}$ | 0.85      | 0.61   | 0.74   | 0.55 | 0.26  |
| $PM_{10}$  |           | 0.66   | 0.61   | 0.61 | 0.17  |
| $SO_2$     |           |        | 0.59   | 0.67 | 0.23  |
| $NO_2$     |           |        |        | 0.50 | 0.32  |
| $CO$       |           |        |        |      | 0.14  |
